# Supplementary material
Source: HighWire-hosted journal article supplement (https://hw-f5-jim.highwire.org/content/jim-2017-000518)
Supplement: inline-supplementary-material-1 [file inline-supplementary-material-1.pdf]

Supplemental Table 1. Differences in survival time between females and males with malnutrition

| Malnutrition  | In-hospital mortality | Log-rank test, | One-year mortality | Log-rank test, |
|---------------|-----------------------|----------------|--------------------|----------------|
|               | Mean $\pm$ SE         | p-value        | Mean $\pm$ SE      | p-value        |
| Gender (n=46) |                       | 0.051          |                    | 0.949          |
| Female (n=17) | 31.1 $\pm$ 9.1        |                | 212.5 $\pm$ 42.3   |                |
| Male (n=29)   | 29.2 $\pm$ 2.4        |                | 220.1 $\pm$ 27.5   |                |
